# Supplementary material
Source: MDPI journal article supplement (https://www.mdpi.com/2227-9717/8/12/1668)
Supplement: s1 [file s1]

## Sheet: Tabelle1
Name	Na2O	MgO	SiO2	P2O5	SO3	Cl	K2O	CaO	Zn	Pb	Cu	Cd	Mn	Fe	Al	Ti	Au	Ag	Ni	As	Ba	Be	Bi	Br	Co	Cr	Cs	Eu	Hf	Ge	In	Li	Nb	Mo	Rb	Re	Sb	Sc	Se	Sr	Ta	Te	Th	Tl	U	V	W	Y	Zr
Unit	mg/kg	mg/kg	mg/kg	mg/kg	mg/kg	mg/kg	mg/kg	mg/kg	mg/kg	mg/kg	mg/kg	mg/kg	mg/kg	mg/kg	mg/kg	mg/kg	µg/kg	mg/kg	mg/kg	mg/kg	mg/kg	mg/kg	mg/kg	mg/kg	mg/kg	mg/kg	mg/kg	mg/kg	mg/kg	mg/kg	mg/kg	mg/kg	mg/kg	mg/kg	mg/kg	mg/kg	mg/kg	mg/kg	mg/kg	mg/kg	mg/kg	mg/kg	mg/kg	mg/kg	mg/kg	mg/kg	mg/kg	mg/kg	mg/kg
Sample/Method	ED-XRF	ED-XRF	ED-XRF	ED-XRF	ED-XRF	ED-XRF	ED-XRF	ED-XRF	ED-XRF	ED-XRF	ED-XRF	ED-XRF	ED-XRF	ED-XRF	ED-XRF	ED-XRF	INAA	MULT INAA/TD-ICP-MS	MULT INAA/TD-ICP-MS	INAA	MULT INAA/TD-ICP-MS	TD-MS	TD-MS	INAA	MULT INAA/TD-ICP-MS	INAA	MULT INAA/TD-ICP-MS	TD-MS	INAA	TD-MS	TD-MS	TD-MS	TD-MS	TD-MS	TD-MS	TD-MS	INAA	INAA	MULT INAA/TD-ICP-MS	TD-MS	MULT INAA/TD-ICP-MS	TD-MS	MULT INAA/TD-ICP-MS	TD-MS	MULT INAA/TD-ICP-MS	TD-MS	INAA	TD-MS	TD-MS
FA01	87300	18500	93400	12500	80600	127600	66400	337400	20710	5689	1328	197.4	981.5	22560	26621.3	11400	247	12.9	91.3	44.4	196	0.8	51.7	1940	53.6	466	4.5	0.41	< 1	0.1	1	45.6	0.2	15.3	79.8	0.016	1740	3.2	2.7	389	< 0.1	0.2	2	0.77	1.4	21	51	7.8	96
FA02	58900	22100	148100	14100	115500	67000	38500	341500	13850	2911	1158	108.1	968.4	30710	32390.1	16200	1170	12.8	105	61.3	154	0.6	47.8	812	31.9	765	3.65	0.33	3	0.3	0.6	36	3.6	10.5	35.6	0.004	1890	3.5	2.9	313	0.1	< 0.1	2.6	0.56	1.2	12	29	7	143
FA03	88400	12000	64700	9130	111300	153100	65600	307400	34830	5897	1274	286.4	598	9421	16248	11990	455	30	73	120	141	0.4	47.9	3060	52.7	615	5.71	0.24	< 1	0.2	0.9	39	< 0.1	2.64	82.8	0.008	1890	4.9	2.7	327	< 0.1	< 0.1	1.9	0.86	0.8	2	< 1	4.6	69
FA04	62100	17500	105500	11400	74500	120900	47400	356200	25710	4138	1517	191.5	876.8	17640	26197.9	13500	3670	22.4	218	9	176	0.7	52.5	2710	79.2	463	4.7	0.34	4	0.1	0.8	31.6	0.4	2.79	63	0.074	3030	2.2	2	337	< 0.1	< 0.1	3	0.82	1.1	6	30	15.2	220
FA05A	73900	13300	83900	7360	138500	143300	64700	253200	39230	13770	1110	243.8	828.6	21120	20376.1	10840	1240	94.2	92.4	49	146	0.4	118	1230	43.7	469	5.7	0.33	< 1	0.2	1.4	51.8	0.1	4.34	83.4	0.009	2090	1.6	4.1	343	< 0.1	0.2	1.8	1.11	0.8	9	< 1	6.1	63
FA06	52200	18700	95900	15700	125200	95300	52700	373700	15880	2380	737.2	95.5	1031	27930	24980.6	11050	388	13.6	76.1	54.4	168	0.7	98.6	856	26.9	375	3.85	0.37	2	0.1	0.8	28.6	< 0.1	6.16	66.3	0.005	798	2.2	4	523	< 0.1	0.2	5.2	0.58	1.9	15	16	10	51
FA07	110500	9490	51200	6730	108500	258400	32400	289400	19770	4225	1103	154.7	534.4	12910	11961	8917	367	21.7	78	73	155	0.3	117	2750	30.1	265	4.37	0.25	< 1	< 0.1	1.6	55	< 0.1	6.62	57.3	0.01	1120	1.2	4.6	294	< 0.1	0.3	1.3	0.97	0.7	8	< 1	5.2	44
FA08	94800	13900	89200	10600	111400	149000	70200	277700	32970	5811	1378	231.7	769.6	15090	17994.5	11730	366	30.2	107	59.7	118	0.5	264	2140	28.1	352	7.74	0.3	< 1	0.3	2.6	51.8	< 0.1	6.2	96.4	0.022	2150	1.5	4.6	371	< 0.1	< 0.1	2	1.18	1.1	11	35	6.9	95
FA09	107100	11600	91700	8310	123200	153200	64000	274900	34980	6001	1494	269.1	586.9	11490	18735.5	10890	426	47	71.5	78.2	207	0.5	63.4	1840	35.3	275	8.44	0.33	< 1	1.2	4.5	49.1	< 0.1	8.61	105	0.014	1700	1.6	5.4	361	< 0.1	< 0.1	2.3	1.33	1	14	< 1	6.5	84
FA10	103100	11800	81500	10900	125000	165400	84900	250100	29690	6027	2842	239.5	617.8	13000	15877.5	12290	1860	35.9	85.6	76.4	186	0.4	61.4	2180	68.9	603	6.51	0.2	< 1	0.2	0.9	44.7	0.1	4.32	74.9	0.017	2240	2.6	4.6	334	< 0.1	0.2	2	1.17	0.9	11	51	5.6	106
FA11	118600	8110	62600	6490	163000	151400	104100	183100	54630	11470	2609	346.6	742.7	11750	12807.8	7018	420	49.5	99.3	163	128	0.5	156	4290	37.5	421	< 0.05	0.42	< 1	0.6	1.9	55.6	< 0.1	5.89	132	0.044	4540	3.9	5.9	343	< 0.1	< 0.1	2	2.06	1.2	9	< 1	8.2	110
FA12	94500	12300	89500	7140	131400	122900	60600	242700	49880	19130	2293	266.7	768.8	18940	18259.1	9179	4060	48.6	130	71.8	175	0.5	139	3440	58.9	404	7.65	0.34	< 1	0.3	3.9	59	0.1	7.59	97.1	0.019	4110	2.1	4.5	397	< 0.1	< 0.1	2.4	1.56	1	15	< 1	6.8	78
FA13	104300	10900	69200	6480	156700	156200	102100	211700	37030	9539	2712	296.8	820.2	16140	15877.5	8132	745	47.8	73	111	156	0.5	68.7	1370	50.8	354	< 0.05	0.3	< 1	0.9	1.6	51.1	0.1	5.7	144	0.029	2970	2.3	7.6	321	< 0.1	< 0.1	2.3	2.01	1	14	< 1	13.2	58
FA14	45600	27000	120900	10300	118900	76500	33700	375900	17930	4745	845.6	120	926.7	19610	25827.4	13430	488	14.9	87.9	55.5	184	0.9	39.4	702	40.8	430	4.48	0.38	1	0.4	0.4	28	0.1	7.47	59	0.024	745	3	2.7	493	< 0.1	0.2	4.1	0.67	1.5	21	13	8.9	107
FA15	100400	12600	84500	9330	131100	155000	73400	256800	37150	6728	1263	284.9	870.3	12690	15983.4	10660	407	34.3	94.7	73.3	175	0.5	115	2170	35.5	388	9.99	0.34	< 1	0.4	1.3	43.3	< 0.1	7.33	111	0.019	2610	1.8	5.2	381	< 0.1	< 0.1	2.2	1.22	1	9	48	6.9	54
FA16	113000	11300	71300	6670	172100	144200	81200	200800	49230	11690	2846	351.6	915.3	17910	12754.9	8517	725	33.3	134	105	90	0.4	117	2260	39.8	401	9.49	0.33	< 1	0.6	2.2	51.4	0.2	11.5	103	0.066	2530	1.6	6.5	304	< 0.1	0.1	2	1.54	1	14	17	15.8	134
FA17	114100	4700	95500	13400	201500	69300	65800	215000	40296.7	8611.33	2899.33	329.767	1569	31216.7	18523.8	8750.33	1970	45.5	178	76.8	82	0.5	108	1620	85.3	669	8.65	0.41	< 1	< 0.1	10	151	0.1	28.4	101	0.034	2490	2.5	7.5	389	< 0.1	0.6	2.2	1.24	1	13	46	8.3	72
FA18	91900	12500	78300	11200	154500	139000	71800	218500	53430	9249	6647	283.1	759.4	20800	21170	8879	747	47.1	76.1	78.6	224	0.5	76.1	2570	62.1	465	9.82	0.38	2	2	3	49.9	1.3	12.3	126	0.022	2160	1.9	< 0.1	404	< 0.1	0.5	2.4	1.75	1.5	14	15	8.1	109
FA19	144700	7010	56600	8710	125200	217600	110400	160100	46980	8093	1792	331.4	556.2	9635	9632.35	9308	803	47.7	94.8	100	153	0.4	111	2750	22	343	9.63	0.3	< 1	0.5	2.3	47.6	< 0.1	3.79	114	0.017	2780	1.3	4.4	289	< 0.1	< 0.1	1.6	1.52	0.7	6	< 1	5.5	72
FA20	70800	14600	75400	10100	170700	134600	67600	296400	26840	6116	2712	198.3	1043	15980	17412.3	8126	1860	29.2	335	54	163	0.6	63.7	1270	79.8	603	5.54	0.3	< 1	0.3	1.1	36.1	< 0.1	19.5	90.9	0.024	2160	2.3	9.4	327	< 0.1	0.2	2.4	1.33	1.3	16	16	6.4	39
FA21	100676	13876.2	72726.8	9191.73	100971	194660	56882.4	280771	23090	5009	1303	182	869.7	16500	17865.1	10270	564	23.3	106	59.6	189	0.5	171	2540	49.7	523	6.49	0.32	2	0.4	2.7	47	< 0.1	70.9	85.4	0.037	1940	2	4.2	368	< 0.1	0.2	2	1.21	3	15	18	12.4	80
FA22	79944	14257.5	75564.9	7729.62	149908	134937	58252.2	234638	66450	16910	2419	258.3	819.8	23280	15846.2	8887	576	42.8	161	78.7	146	1.5	150	2130	41.2	451	9.77	0.36	< 1	0.9	3.3	64.8	0.1	15.9	124	0.032	2610	1.7	8	363	< 0.1	0.2	2.3	1.53	1.1	16	7	7.2	87
FA23	104000	12400	79400	8020	152600	151400	62800	247100	32380	10830	2260	284.3	792.2	18480	17306.5	12100	515	66.1	109	23	184	0.5	93.7	1570	40.8	457	8.58	0.32	< 1	0.6	1.4	48.8	0.3	6.38	118	0.014	2470	1.8	4.5	390	< 0.1	< 0.1	2.4	1.33	1.1	12	13	6.5	83
FA24	127000	10200	81200	6810	158900	153200	76300	199000	48870	10520	2320	317.1	756.7	20430	14025.1	8055	1120	38.3	167	101	145	0.5	127	3840	96.3	533	< 0.05	0.34	2	1.3	1.7	80.9	0.5	14.9	159	0.038	3600	2.6	9.5	369	< 0.1	< 0.1	2.4	2.06	1.1	18	12	8.5	99
FA25	12000	8200	93900	15500	179200	8800	12000	360000	59340	12010	3271	200.1	802.1	15280	22916.5	12220	4560	79.8	166	157	248	0.5	62.1	153	45.7	795	2.22	0.33	2	0.2	2.6	31.6	< 0.1	13.7	20.7	0.01	4430	2.7	8.4	463	< 0.1	0.2	2.1	0.95	1.2	12	11	9.2	53
FA26	115700	13800	80200	9690	144500	138100	78500	283400	17420	4307	1337	202.2	688.4	11220	19582.2	10590	989	21.7	84.5	13.3	203	0.5	46.5	1740	45.3	541	8.35	0.36	2	< 0.1	5.4	45.4	< 0.1	7.32	108	0.009	2260	2.4	3.9	415	< 0.1	0.3	2.5	0.9	1.3	14	< 1	10.5	107
FA27	91500	10800	75600	8640	142400	147800	68000	228900	64670	10260	1991	463.7	856.8	17720	15771.6	9014	1010	48.2	127	150	180	0.6	206	3130	73.2	539	< 0.05	0.31	< 1	1	9	46.7	0.1	18.4	144	0.041	2350	3.8	7.7	329	< 0.1	0.1	2.1	1.92	1.1	17	49	6.1	85
FA28	108500	12600	88400	8500	127900	145000	67400	286400	32420	5877	1572	284.7	635.2	13740	19211.8	10660	684	36.6	145	66.9	174	0.5	98.8	1460	32.3	409	7.86	0.37	1	0.1	11.4	43.2	0.1	12.5	86	0.028	1570	1.8	12.5	386	< 0.1	< 0.1	2.8	1.25	1.1	14	8	12.9	91
FA29	113600	3200	96000	13500	154000	113200	59000	236000	19460	3413	1837	36.3	853.7	18390	19370.5	14270	20600	45.8	201	108	174	0.8	81.1	1540	77.9	1460	7.51	0.35	< 1	0.6	2.5	40.2	< 0.1	16.2	85.7	0.02	2070	2.9	5.9	303	< 0.1	< 0.1	2.5	1.2	1.1	5	114	16	121
Average	92728.3	12732.5	84548	9797.63	136179	137483	65401.2	268231	36038.5	7977.8	2030	243.295	822.041	17640.8	18673.3	10581.8	1828.69	38.6621	123.007	78.3414	166.207	0.568966	101.807	2071.14	50.5276	511.517	6.848	0.333103	2.1	0.530769	2.85517	50.1655	0.4625	12.1776	94.9414	0.0243448	2380.79	2.37586	5.56786	366.414	< 0.1	< 0.1	2.37241	1.26207	1.17931	12.5172	29.95	8.7	90
Median	100400	12400	81500	9191.73	131400	144200	65800	256800	34830	6116	1792	258.3	819.8	17640	17994.5	10660	745	36.6	105	73.3	174	0.5	98.6	2130	45.3	463	7.51	0.33	2	0.4	1.9	47	0.1	7.59	96.4	0.02	2240	2.2	4.6	363	< 0.1	< 0.1	2.3	1.22	1.1	14	17.5	7.8	85
Max	144700	27000	148100	15700	201500	258400	110400	375900	66450	19130	6647	463.7	1569	31216.7	32390.1	16200	20600	94.2	335	163	248	1.5	264	4290	96.3	1460	9.99	0.42	4	2	11.4	151	3.6	70.9	159	0.074	4540	4.9	12.5	523	< 0.1	< 0.1	5.2	2.06	3	21	114	16	220
Min	12000	3200	51200	6480	74500	8800	12000	160100	13850	2380	737.2	36.3	534.4	9421	9632.35	7018	247	12.8	71.5	9	82	0.3	39.4	153	22	265	2.22	0.2	< 1	0.1	0.4	28	0.1	2.64	20.7	0.004	745	1.2	2	289	< 0.1	< 0.1	1.3	0.56	0.7	2	< 1	4.6	39
[truncated: 24 more columns]
